RESEARCH ARTICLE

# Impact of substrate choice on human osteoclast differentiation and secretome: Implications for targeted therapeutic development

Fernanda D'Amélio<sup>1,2,3</sup>, Hugo Vigerelli<sup>1,3</sup>, Rodrigo Pinheiros Araldi<sup>4</sup>, Adriana da Costa Neves<sup>1</sup>, Álvaro Rossan de Brandão Prieto-da-Silva<sup>1</sup>, Daniel Pimenta<sup>5</sup>, Irina Kerkis<sup>1,3\*</sup>

**1** Laboratory of Genetics, Butantan Institute, São Paulo, Brazil, **2** The Postgraduate Program in Toxinology, Butantan Institute, São Paulo, Brazil, **3** Centre of Excellence in New Target Discovery (CENTD), Butantan Institute, São Paulo, Brazil, **4** BioDecision Analytics Ltda., São Paulo, Brazil, **5** Laboratory of Biochemistry and Biophysics, Butantan Institute, São Paulo, Brazil

\* [irina.kerkis@butantan.gov.br](mailto:irina.kerkis@butantan.gov.br)

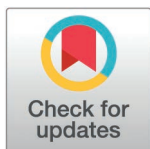

## OPEN ACCESS

**Citation:** D'Amélio F, Vigerelli H, Araldi RP, da Costa Neves A, Prieto-da-Silva ÁRdB, Pimenta D, et al. (2025) Impact of substrate choice on human osteoclast differentiation and secretome: Implications for targeted therapeutic development. PLoS One 20(10): e0333180. <https://doi.org/10.1371/journal.pone.0333180>

**Editor:** Gianpaolo Papaccio, Università degli Studi della Campania, ITALY

**Received:** May 5, 2025

**Accepted:** September 10, 2025

**Published:** October 17, 2025

**Copyright:** © 2025 D'Amélio et al. This is an open access article distributed under the terms of the [Creative Commons Attribution License](https://creativecommons.org/licenses/by/4.0/), which permits unrestricted use, distribution, and reproduction in any medium, provided the original author and source are credited.

**Data availability statement:** All relevant data are in the paper and its [supplementary information](#) files.

**Funding:** This research project is supported by São Paulo Research Foundation (FAPESP) and

## Abstract

Osteoclasts (OCs) exhibit substrate-specific molecular adaptations crucial for bone remodeling. We utilized mass spectrometry and functional enrichment analysis to delineate the proteomic profiles of mature polarized OCs cultured on mineralized versus plastic plates. Our findings reveal that mineralized surfaces promote the expression of proteins specialized for bone resorption and matrix interaction, such as lysosomal enzymes and ion transporters. This environment induces a mature and resorptive phenotype in OCs, enriched in pathways like VEGF/VEGFR signaling and various cytokine pathways. Conversely, OCs on plastic plates display a more diverse proteomic profile, highlighting adaptations in adhesion, proliferation, and stress response pathways, suggesting a focus on cellular maintenance rather than active resorption. Key therapeutic targets for osteoclastogenesis include components of the Hedgehog (Hh) pathway—SHH, DHH, and IHH—with Smoothened (SMO) integral to Hh signaling in OC differentiation. Additionally, Guanine Nucleotide Exchange Factors (GEFs), significantly enriched on plastic plates, are crucial for adapting to non-mineralized environments. Other notable targets include molecular regulators such as NCOR2, which modulates gene expression; NOS1, involved in nitric oxide production and OC function; and XIAP, which influences cell survival. Chromatin remodeling proteins like TACC2 and signaling pathways involving IRS1, MSX1, and AKT are also highlighted. The targets identified in this study are specific to polarized OCs and may not apply to non-polarized OCs or other cell types. These findings underscore the complexity of OC differentiation and function, enhancing our understanding of substrate-specific adaptations and suggesting new strategies for modulating bone metabolism and addressing bone-related disorders.

GlaxoSmithKline (GSK; Grant No. 2015/50040-4 to IK). The funders played no role in the study design, data collection and analysis, decision to publish, preparation of the manuscript.

**Competing interests:** Financial support for this work was provided by GlaxoSmithKline (GSK; Grant No. 2015/50040-4 to IK). This does not alter our adherence to PLOS ONE policies on sharing data and materials.

## Introduction

Osteoclasts (OCs) are multinucleated cells derived from the monocyte/macrophage lineage, crucial for bone remodeling through the resorption of mineralized bone matrix. These cells release enzymes such as tartrate-resistant acid phosphatase (TRAP) and cathepsin K, which degrade the bone matrix and release calcium into the bloodstream, influencing overall bone metabolism [1,2,3]. The differentiation and activity of OCs are markedly influenced by the substrate on which they develop, affecting cell adhesion, signaling pathways, and the surrounding microenvironment.

*In vitro* studies using human peripheral blood mononuclear cells (hPBMCs) to differentiate OCs are crucial for understanding the underlying mechanisms of bone diseases and for developing therapeutic interventions [4]. The principal stages of human OC differentiation *in vitro* involve the initial isolation of hPBMCs, followed by their differentiation into pre-osteoclasts in the presence of macrophage colony-stimulating factor (M-CSF) for approximately 3–5 days. Subsequent exposure to receptor activator of nuclear factor kappa-B ligand (RANKL) drives pre-osteoclasts' maturation into fully functional OCs over an additional 5–7 days [5]. These mature OCs are characterized by their multinucleation, expression of TRAP, and the ability to resorb mineralized bone matrix, typically completing differentiation in 10–14 days [6,7]. Functional assessments of OCs include pit assays, where OCs cultured on mineralized plates are evaluated for their ability to resorb bone matrix. This assay quantifies the resorbed area on the mineralized substrate, directly measuring OC activity and bone resorption capacity [3].

Comparative studies of OCs cultured on plastic versus mineralized plates reveal significant differences. OCs on mineralized plates exhibit characteristics that closely mimic physiological conditions of bone remodeling [8], while OCs on plastic plates show greater adaptability to diverse environmental cues. Understanding these substrate-dependent variations is essential for accurately representing OC biology and developing targeted therapies for inflammatory bone diseases [9,10].

In this study, we investigated the impact of substrate choice on the proteomic profile of mature polarized osteoclasts (OCs) by comparing the secretome profiles of OCs cultured on plastic versus mineralized plates. Using advanced mass spectrometry and functional enrichment analysis, we characterized the distinct proteomic landscapes of these polarized OCs. By focusing specifically on the secretomes of polarized OCs, our analysis provides detailed insights into how substrate-dependent adaptations influence their functional plasticity and regulatory mechanisms in bone metabolism. These findings contribute valuable knowledge that could inform the development of innovative therapeutic strategies for bone disorders.

## Materials and methods

### Human PBMCs and OC differentiation protocol

All procedures were performed in compliance with Plataforma Brasil regulations and were approved by the Ethics Committee of the Butantan Institute (CEP protocol No. 1,806,596; approved on November 5, 2016).

PBMCs were isolated using the Ficoll–Paque density gradient centrifugation method (density 1.077 g/mL—Sigma-Aldrich®, USA). Blood samples (20 mL) were collected from healthy male volunteers aged 25–40 years via venipuncture at the cubital fossa (Plataforma Brasil/CEP 1,806,596), then diluted 1:1 with saline (0.9%) and layered onto Ficoll–Paque at a 1:3 ratio in conical tubes. After centrifugation at 400 X g for 20 minutes without acceleration, the PBMCs were carefully isolated. Following two washes with saline, the cells were resuspended in 1 mL of differentiation medium:  $\alpha$ -MEM (Thermo Fisher Scientific, Waltham, MA, USA), pH 7.4, supplemented with 10% fetal bovine serum (LGC Biotecnologia, SP, Brazil), 25 ng/mL human M-CSF, 50 ng/mL human RANKL, 5 ng/mL human TGF- $\beta$ 1 (R&D Systems, Minneapolis, MN, USA), and 1  $\mu$ M dexamethasone (Sigma-Aldrich®, USA).

For osteoclast differentiation assays,  $6 \times 10^5$  PBMCs were plated per 1.9 cm<sup>2</sup> and cultured in 200  $\mu$ L of differentiation medium. The culture medium was refreshed twice weekly by replacing 50% of the volume for 15 days.

### Tartrate-resistant acid phosphatase (TRAP) Staining

To perform TRAP staining after the differentiation period, the culture medium was first removed, and the cells were gently washed three times with PBS. Subsequently, the cells were fixed by exposure to a solution consisting of 25.5% citrate solution (18 mM citric acid, 9 mM sodium citrate, 12 mM sodium chloride, and surfactant, pH  $3.6 \pm 0.1$ ), 66.3% acetone, and 2.9% formaldehyde for 30 seconds at room temperature.

The TRAP staining solution, previously prepared according to the manufacturer's instructions and warmed to 37 °C, was then applied to the fixed cells. After a 1-hour incubation period at 37 °C, the TRAP solution was carefully aspirated, and the cells were washed three times with PBS. Next, the cells were washed three times with preheated (37 °C) deionized water, followed by staining of the nuclei using Gill Hematoxylin Solution No. 3 for 1–2 minutes at room temperature.

To complete the staining process, the cells were rinsed with alkaline water to provide a counter-stain effect. They were included in PBS for analysis. This protocol allows for the visualization and analysis of differentiated cells under light microscopy Nikon Eclipse TS2K-261134, specifically highlighting the presence and distribution of TRAP-positive osteoclasts.

### Pit assay

We employed the culture plates (96-well) coated with an inorganic crystalline calcium phosphate substrate. Each well received 0.2 mL of osteoclast differentiation medium (as described in 4.2.1) and was seeded with  $6 \times 10^5$  hPBMCs/well. The cells were incubated in a humidified environment with 5% CO<sub>2</sub> at 37°C. On the 15th day, the resorption activity of OCs was quantified, analyzing the mineralized surface. The medium was aspirated, 100  $\mu$ L of 10% bleaching solution was added, followed by 15 minutes of incubation at room temperature. The wells were washed three times with distilled water, and then the water was removed completely, allowing the wells to dry for 3–5 hours. Subsequently, the plate was counter-stained with the Von Kossa staining kit (Merck® KGaA, Germany) to facilitate visualization of the substrate. The analyses were conducted after capturing images of the entire well with a Nikon stereomicroscope and image analysis software (ImageJ®) to calculate the percentage of reabsorbed surface, enabling the quantification of resorption activity.

### Sample preparation and chromatography

The dried protein samples were reconstituted in 0.1% formic acid (designated as solvent A) to ensure they were in a suitable solution for chromatography. The samples were then injected into a C18 reverse-phase chromatography column (Supelco, 3  $\mu$ m particle size, 100 Å pore size, and dimensions of 50 mm x 2.1 mm).

A linear gradient elution was performed, starting with 5% solvent B (composed of 90% acetonitrile and 10% water with 0.1% formic acid) and gradually increasing to 40% solvent B over a 66-minute period. The flow rate was maintained at a constant 0.2 mL/min to ensure consistent separation and peak resolution. The eluted components were continuously

monitored using a Shimadzu SPD-M20A PDA (photodiode array) detector across the wavelength range of 200–500 nm, allowing for the detection of peptides and proteins based on their UV absorbance.

### Mass spectrometry analysis

For mass spectrometry, an IT-ToF (Ion Trap-Time of Flight) mass spectrometer from Shimadzu (Japan) was employed. The instrument operated in positive ion mode, with an interface voltage set at 4.5 kV, a detector voltage of 1.76 kV, and an interface temperature held at 200°C. Data acquisition covered a mass-to-charge ( $m/z$ ) ratio range from 50 to 2000, which is suitable for detecting a broad spectrum of peptides and small proteins.

Subsequent MCMS spectra were generated using collision-induced dissociation (CID) with argon as the collision gas. The MSMS mode allowed for fragmentation of selected precursor ions within the same  $m/z$  range (50–2000), providing detailed information on peptide sequences and post-translational modifications.

### Protein identification

Protein identification was carried out using PEAKS Studio 7.0 software, which incorporated the InChorus multi-algorithm tool, combining both PEAKS and MASCOT algorithms to enhance identification accuracy. The proteins were matched against public protein databases, including those for Homo sapiens and Squamata species, providing a broad comparison across different species.

### Functional enrichment analysis

Identified proteins were subjected to functional enrichment analysis using the FunRich [11]. This tool allowed for categorization based on molecular function, biological processes, and pathways, providing insight into the potential roles of these proteins in various cellular mechanisms.

### Analysis of possible targets and biological pathways

The data were enriched by the Enrichr software, and twenty-one databases were used to analyze OCs on mineralized plates and twenty-two databases to analyze OCs on plastic plates. The P-Adjusted value, less than 0.005, is taken into account for refinement. After this type of data filtering, graphs were made with the count of pathways and genes that were repeatedly highlighted by the results.

## Results

### Substrate-dependent enrichment of protein localization in osteoclasts: Insights from FunRich analysis

In our OC differentiation assays, hPBMCs were cultured on plastic or mineralized plates in a differentiation medium for 15 days (data not shown) [7]. At the endpoint of differentiation, supernatants were collected and subjected to rigorous mass spectrometry analysis. OCs were characterized using established methods [7], and proteins were identified with precision using mass spectrometry and gas chromatography against a human database (IDPROT).

Enrichment analysis using FunRich software [11] revealed distinct patterns across biological processes, cellular components, and molecular functions (S1 and S2 Tables). OCs cultured on plastic expressed 116 proteins, whereas those on mineralized surfaces expressed 49 proteins, with only 4 proteins common to both environments (Fig 1). Common proteins between the two conditions indicate fundamental OC functions independent of substrate cues. Mineralized substrates appear to direct OCs towards a specialized state optimized for bone remodeling, while plastic substrates elicit a more generalized response (Fig 1).

Our data provide fascinating insights into the differences in protein expression and localization between OCs differentiated on mineralized versus plastic plates (Figs 2A and 2B). The functional similarities between the sarcoplasmic

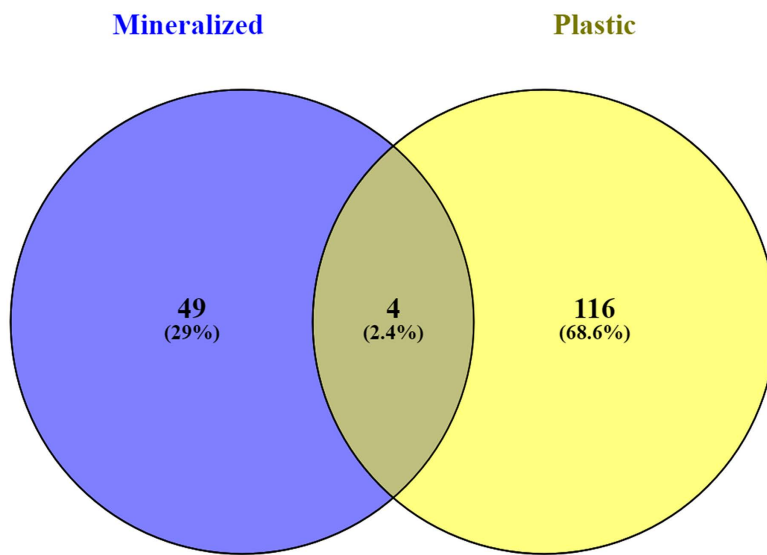

**Fig 1. Venn diagram shows osteoclasts: 116 proteins on plastic, 49 on mineralized, with only 4 shared.**

<https://doi.org/10.1371/journal.pone.0333180.g001>

components in OCs and muscle tissue, particularly in calcium ion storage and release, suggest that these OCs may have specialized roles in calcium handling, crucial for their bone-resorbing activities (Fig 2A). The presence of microfibrils and crystalline features in the cell membrane is intriguing, as these characteristics are typically associated with plant cell walls and are rarely observed in human cells. This suggests that the mineralized environment may influence the structural organization of OCs, possibly enhancing their interaction with the mineralized matrix. Moreover, identifying hemidesmosomes and proteins related to the basal membrane in OCs differentiated on mineralized plates suggests that these cells may form more robust attachments to their substrate, potentially influencing their resorptive activity and overall function. The similarities in protein functions between the basal membrane and those in OCs may indicate shared roles in cell adhesion and nutrient support. Detecting neurofilament-like structures in these OCs raises interesting questions about potential crosstalk between osteoclasts and the nervous system or the adoption of neuronal features by OCs under certain conditions (Fig 2A).

Conversely, OCs differentiated on plastic plates show enrichment of cytoplasmic proteins, with a focus on structures like the sarcolemma, cytosol, and nucleus. The presence of platelet alpha-granules and synaptosomes suggests that these OCs may be more involved in secretory and signaling functions, reflecting a different aspect of OC activity than those on mineralized plates (Fig 2B).

While our analysis did not reveal statistically significant differences in protein expression, the observed trends are still meaningful and provide a foundation for future studies. These findings highlight the importance of considering both statistically significant results and emerging patterns when interpreting complex biological data, especially in the context of osteoclast differentiation and function.

### Enrichment analysis of guanine nucleotide exchange factors in osteoclasts differentiated on plastic and mineralized plates

Furthermore, enrichment analysis highlights the significant presence of guanine nucleotide exchange factors (GEFs) ( $p=0.004$ ) in the molecular functions of OCs differentiated on plastic but not on mineralized plates (Figs 2C and 3D). GEFs regulate small GTPases such as Rho and Rac, which are crucial for OC cytoskeletal dynamics, migration, and bone



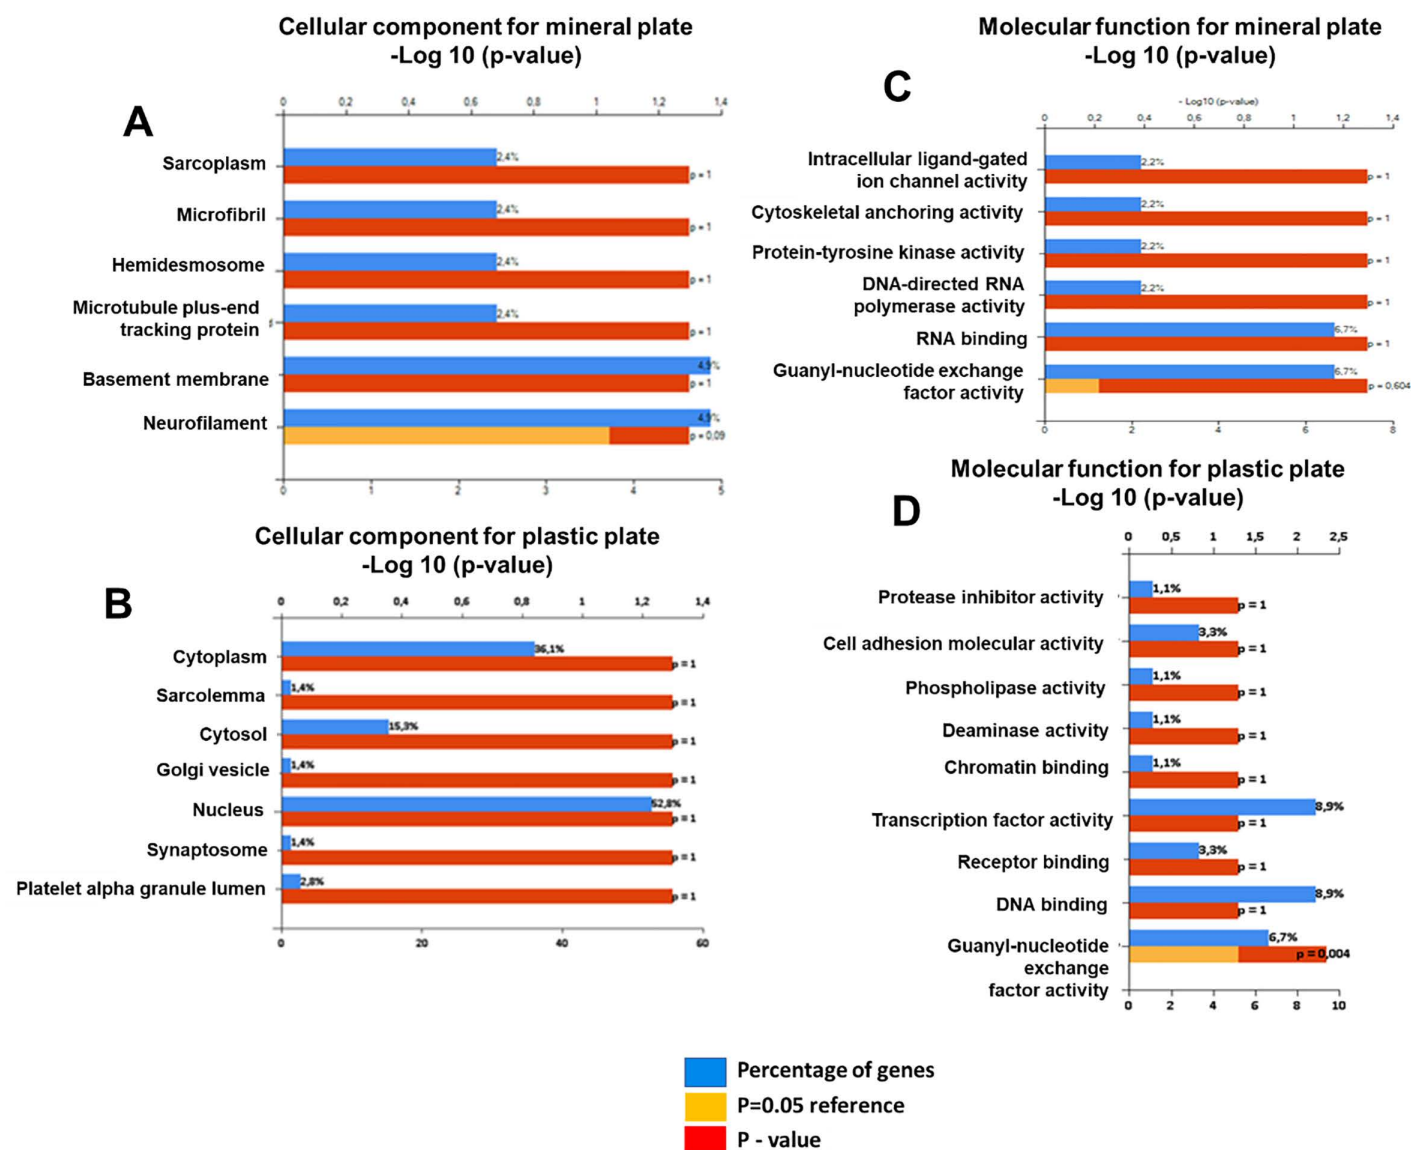

**Fig 2. Enrichment analysis of cellular components (A, B) and molecular functions (C, D) of osteoclasts on mineralized versus plastic plates, showing substrate-dependent secretome variations.**

<https://doi.org/10.1371/journal.pone.0333180.g002>

resorption. Dysregulated GEF-mediated signaling could contribute to abnormalities such as osteoporosis or osteopetrosis [12,13].

### Adaptations of osteoclasts: Contrasting roles on mineralized and plastic surfaces

Biological process analysis also reveals distinct protein enrichment profiles in OCs differentiated on mineralized versus plastic plates (Figs 3A, 3B). OCs on mineralized plates (Fig 3A) exhibit significant enrichment in transport processes, emphasizing their role in systemic calcium regulation—a vital function of these cells. These OCs feature an array of membrane transport proteins, including channels, transporters, and pumps, which are crucial for ion exchange and matrix

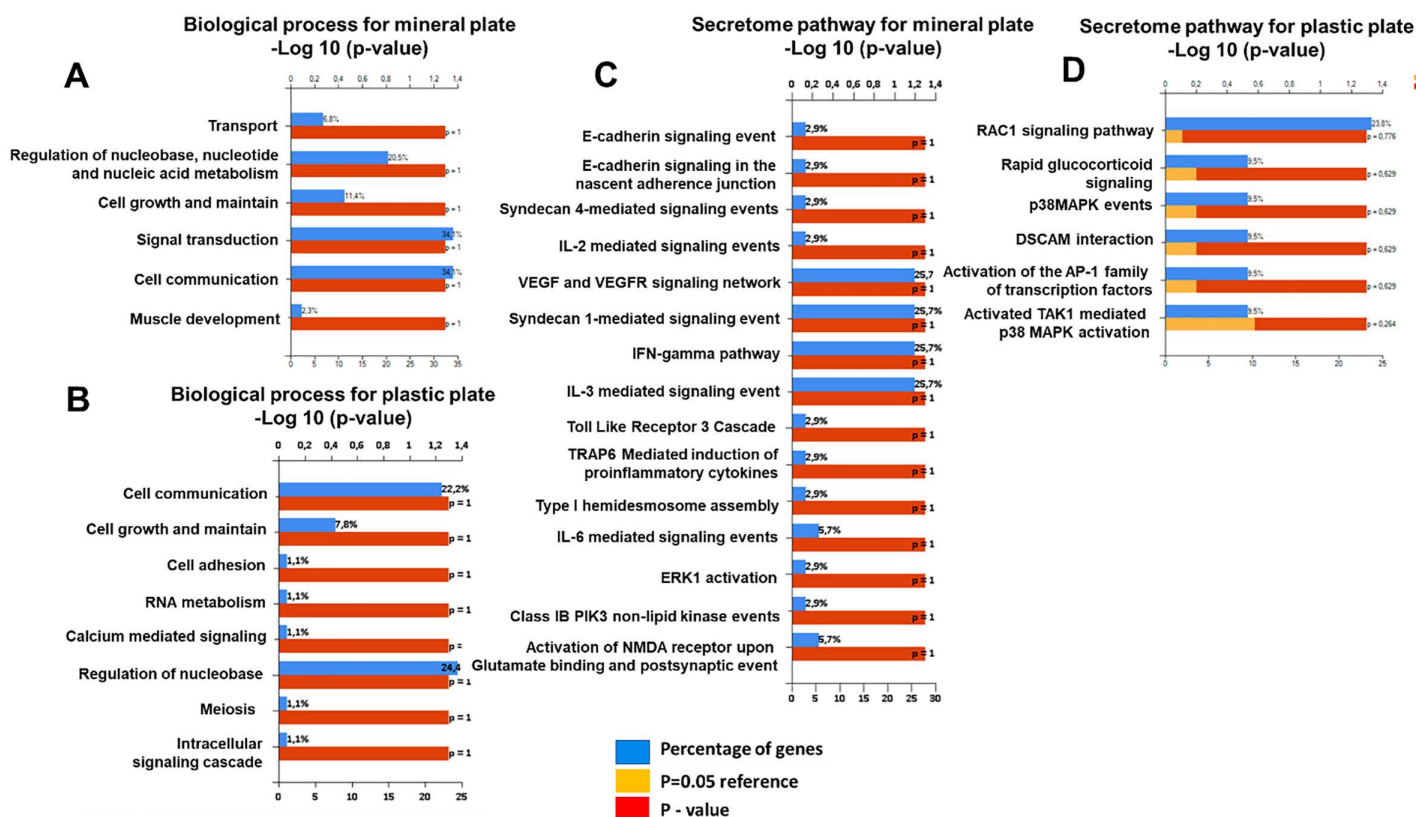

**Fig 3. Enrichment analysis of biological processes (A, B) and secretome pathways (C, D) in osteoclasts on mineralized versus plastic plates, showing substrate-dependent variations.**

<https://doi.org/10.1371/journal.pone.0333180.g003>

digestion. The maintenance of low pH during bone resorption underscores the importance of these transport proteins for bone differentiation, function, and homeostasis, suggesting they are potential therapeutic targets for bone diseases.

In contrast, OCs on plastic plates show enrichment in RNA metabolism cell communication, growth, adhesion, and RNA metabolism processes, reflecting their adaptation to a less physiologically relevant environment (Fig 3B). These cells prioritize calcium-mediated signaling and intracellular cascades, indicating active responses to the artificial substrate through cytoskeletal dynamics and metabolic activity adjustments.

Notably, the enrichment of muscle biology-related processes in OCs on mineralized plates suggests potential crosstalk with muscle tissue development (Fig 3A). This connection highlights the integrated nature of bone and muscle tissues, where signaling from OCs during bone remodeling may influence muscle mass, mediated by molecules such as ATP.

The FunRich analysis of proteins secreted by OCs differentiated on mineralized versus plastic plates reveals distinct biological pathways reflective of their substrate-specific adaptations (Figs 3C, 3D). OCs on mineralized plates exhibit enrichment in pathways such as VEGF and VEGFR signaling, syndecan-1 mediated signaling, cytokine pathways (IL-3, IL-6, IFN-gamma), and NMDA receptor activation, highlighting their focus on bone resorption, remodeling, and interaction with the mineralized matrix (Fig 2D).

OCs on plastic plates show enrichment in pathways related to cell communication, nucleic acid metabolism, and cellular maintenance, indicative of their adaptation to a non-mineralized environment (Fig 3D). These findings underscore how OCs adjust their molecular strategies based on substrate cues, providing insights into bone metabolism and potential targets for therapeutic intervention in bone-related disorders.

**Figs 3A–3D** displays enrichment graphs illustrating differences in biological processes and secretome pathways of OCs differentiated on mineralized versus plastic plates. Secretome data collected on day 14 of differentiation reveal substrate-dependent variations in protein expression and functional profiles, shedding light on how substrate choice influences OC function and secretome composition.

## Integrated databases enrichment analysis reveals substrate-dependent pathways in osteoclasts cultured on mineralized versus plastic plates

Combining 22 databases for plastic plates and 21 for mineralized plates enriches our comparison of OCs cultured on different substrates, leveraging each database's strengths. Enrichment analyses from CORUM, Elsevier, and Wikipathway highlight critical metabolic and signaling pathways, while Reactome provides detailed insights into molecular interactions. Integrating these analyses identifies consistently enriched pathways and proteins, revealing how OCs adapt to their micro-environment ([S2](#) and [S3 Tables](#)).

Based on enrichment analysis of OCs cultured on mineralized plates, several pathways exhibited significant enrichment with adjusted p-values < 0.05 ([Table 1](#)). These pathways include the Complement Cascade proteins (IGHG3, IGHG4, IGHG1, IGHG2), the PAX9-MSX1 complex (in humans) with MSX1, ITK-SLP-76 complex in anti-TCR stimulated conditions with ITK, and the AMY-1-S-AKAP84-RIL-beta complex (in humans) featuring AKAP1, as well as the SLP-76-PLC-gamma-1-ITK complex in alpha-TCR stimulated conditions involving ITK, and finally the Sam68-p85 PI3K-IRS-1-IR Signaling Complex (in humans) ([Table 1](#)). Enriched protein analysis identifies 10 potential therapeutic targets for bone diseases ([Table 1](#)): ITK (repeated 2 times), IGHG3, IGHG4, IGHG1, IGHG2, IRS1 (each repeated 1 time), MSX1, and AKT (each repeated 1 time), with statistically adjusted values.

Based on the enrichment analysis of OCs cultured on plastic plates, pathways crucial for osteoclastogenesis, particularly those involving Hedgehog (Hh) signaling, emerge prominently. The Release of Hh-Np (Np – N-terminal Peptide) from secreting cells, Activation of Smoothened (SMO), and various Hh Family Signaling pathways identified across Reactome, Wikipathway, Elsevier, and NCI-nature databases play pivotal roles in regulating these processes. The Nitric Oxide (NO) synthase-dystrophin complex in skeletal muscle, as well as both canonical and non-canonical Hedgehog signaling pathways involving ARRB1/ARRB2, play significant roles in osteogenesis. Additionally, intraflagellar transport mediated by BBSome interactions, the SMRT-SKIP-CBF1 complex, and chromatin remodeling complexes such as TACC2, TACC3, and PCAF are crucial. The Polyadenylation complex also underscores the intricate mechanisms governing mRNA processing and stability in osteoclast development ([Table 2](#)).

Enriched gene analysis (on plastic plate) identifies 10 potential therapeutic targets for bone diseases ([Fig 4B](#)): DHH, IHH, NCOR2, SHH (repeated 9 times), SNX4 (repeated 6 times), NOS1 (repeated 3 times), REC8 (repeated 2 times), SYMPK, XIAP, and TACC2 (each repeated 1 time), with statistically adjusted values ([Table 2](#)).

**Table 1.** This table summarizes the pathways and their corresponding proteins that showed significant enrichment in OCs cultured on mineralized plate, based on the adjusted p-values < 0.05 from the analysis.

| Pathway description                                          | Database  | Adjusted P-value | Gene/ Complex involved    |
|--------------------------------------------------------------|-----------|------------------|---------------------------|
| Complement cascade                                           | Bioplanet | 0.00360          | IGH3, IGHG4, IGHG1, IGHG2 |
| PAX9-MSMX1 Complex (Human)                                   | CORUM     | 0.00529          | MSX1                      |
| ITK-SLP-76- Complex, Anti-TCR Stimulated (Human)             | CORUM     | 0.00529          | ITK                       |
| AMY-1-S-AKAP84-RIL-beta Complex (Human)                      | CORUM     | 0.00792          | AKAP1                     |
| SLP-76-PLA-gamma-1-ITK Complex, Alpha-TCR Stimulated (Human) | CORUM     | 0.00792          | ITK                       |
| Sam68-p85 PI3K-IRS-1-IR Signaling Complex (Human)            | CORUM     | 0.01055          | IRS1                      |

<https://doi.org/10.1371/journal.pone.0333180.t001>



**Table 2.** This table summarizes the pathways and their corresponding proteins and genes that showed significant enrichment in OCs cultured on plastic plate, based on the adjusted p-values < 0.05 from the analysis.

| Pathway description                                                             | Database    | Adjusted P-value | Gene/ Complex involved                         |
|---------------------------------------------------------------------------------|-------------|------------------|------------------------------------------------|
| Release of Hh-Np from secreting Cell                                            | Reactome    | 0.00115          | SHH                                            |
| Activation of SMO                                                               | Reactome    | 0.01073          | SHH                                            |
| Hedgehog Signaling Pathway (WP47)                                               | Wikipathway | 0.01181          | SHH                                            |
| ARRB1/ARRB/2 non-Canonical signaling and Hedgehog Family                        | Elsevier    | 0.00704          | SHH                                            |
| Hedgehog Family ->ARRB1/ARRB2 Canonical Signaling                               | Elsevier    | 0.00880          | SHH                                            |
| Hedgehog Family Signaling                                                       | Elsevier    | 0.02608          | SHH                                            |
| Signaling events mediated by the Hedgehog family (Homo sapiens)                 | NCI-nature  | 0.00836          | SHH                                            |
| Release of Hh-Np from secreting Cell                                            | Reactome    | 0.00115          | R-HSA-5362798                                  |
| Activation of SMO                                                               | Reactome    | 0.01073          | R-HSA-5635838                                  |
| Hedgehog Signaling Pathway                                                      | Wikipathway | 0.01181          | WP47                                           |
| ARRB1/ARRB/2 non-Canonical signaling and Hedgehog Family                        | Elsevier    | 0.00704          | –                                              |
| Intraflagellar Transport: BBSome Interaction                                    | Elsevier    | 0.03001          | –                                              |
| Signaling events mediated by the Hedgehog family (Homo sapiens)                 | NCI-nature  | 0.00836          | d3a49cee-6195-11e5-8ac5-06603eb7f303           |
| Nitric oxide synthase-dystrophin complex, skeletal muscle (mouse)               | CORUM       | 0.0313           | NOS1                                           |
| ARRB1/ARRB/2 non-Canonical signaling and Hedgehog Family                        | Elsevier    | 0.00704          | ARRB1/ARRB2                                    |
| Hedgehog Family ->ARRB1/ARRB2 Canonical Signaling                               | Elsevier    | 0.00880          | ARRB1/ARRB2                                    |
| Intraflagellar Transport: BBSome Interaction                                    | Elsevier    | 0.0300           | Bbsome                                         |
| Signaling events mediated by the Hedgehog family (Homo sapiens)                 | NCI-nature  | 0.00836          | Hedgehog family                                |
| SMRT-SKIP-CBF1 complex (human)                                                  | CORUM       | 0.0313           | SMRT-SKIP-CBF1                                 |
| Chromatin remodeling complex (TACC2, TACC3, PCAF) (human)                       | CORUM       | 0.0313           | TACC, TACC3, PCAF                              |
| Polyadenylation complex (CSTF1, CTF2, CSTF3, SYMPK CPSF1, CPSF2, CPSF3) (human) | CORUM       | 0.0448           | CSTF1, CSTF2, CSTF3, SYMPK CPSF1, CPSF2, CPSF3 |

<https://doi.org/10.1371/journal.pone.0333180.t002>

STRING network analysis further supported these findings: in osteoclasts cultured on mineralized plates (Fig 4C), the identified proteins did not form interconnected clusters, whereas in osteoclasts on plastic plates (Fig 4D), DHH, IHH, and SHH formed a discrete cluster that remained isolated from the other proteins, indicating substrate-specific regulation of the hedgehog signaling pathway in osteoclasts cultured on plastic.

## Discussion

Using polarized OCs provides a more accurate representation of the proteins involved in bone resorption and the regulatory mechanisms active in a mature osteoclast state. This results in a secretome that reflects their enhanced functional capabilities and substrate-dependent adaptations, offering deeper insights into their role in bone metabolism and potential therapeutic targets.

The functional enrichment analysis of proteins secreted by OCs differentiated on mineralized versus plastic plates reveals distinct biological pathways reflective of their substrate-specific adaptations. OCs on mineralized plates exhibit enrichment in pathways crucial for bone resorption, remodeling, and interaction with the mineralized matrix, including VEGF and VEGFR signaling, syndecan-1-mediated signaling, cytokine pathways (IL-3, IL-6, IFN-gamma), and NMDA receptor activation [14–19]. These molecular characteristics suggest that OCs on mineralized plates mature and polarize toward active resorption activities within the bone matrix.

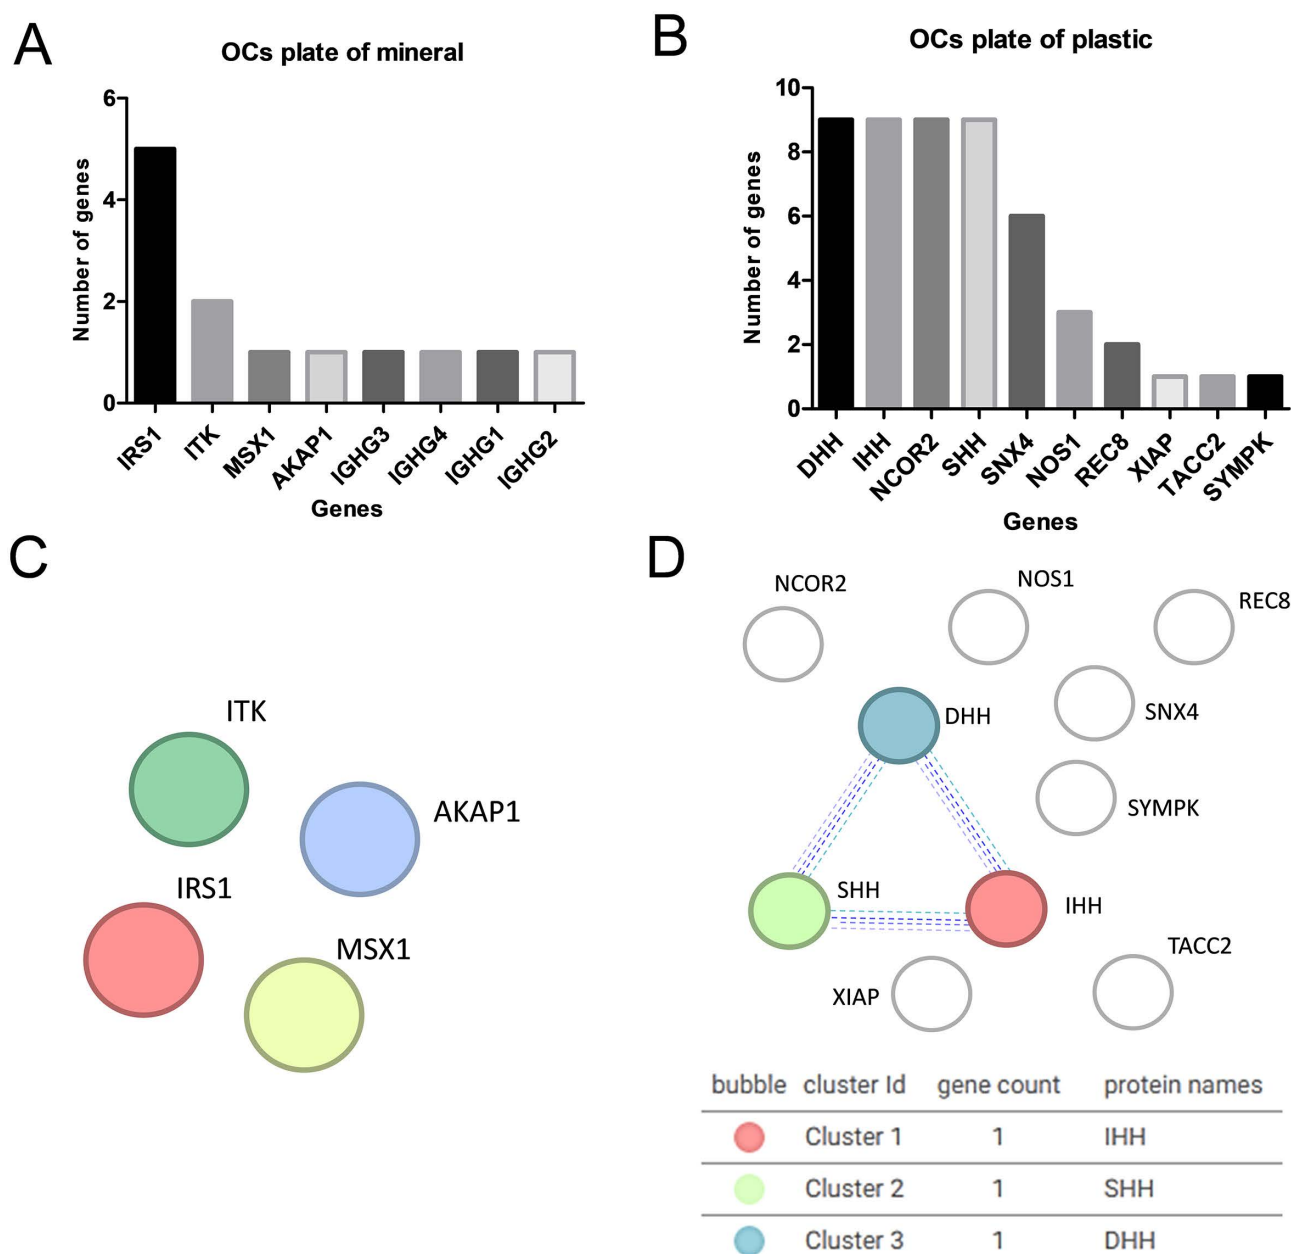

**Fig 4. Target definitions for osteoclasts on mineralized (A, C) versus plastic (B, D) plates.** STRING analysis shows no clusters on mineralized plates (C), while DHH, IHH, and SHH form a discrete cluster on plastic plates (D).

<https://doi.org/10.1371/journal.pone.0333180.g004>

In contrast, OCs differentiated on plastic plates show enrichment in pathways related to cell communication, nucleic acid metabolism, and cellular maintenance. This pattern indicates a focus on maintaining cellular functions rather than active resorption, suggesting that OCs on plastic plates may not be as mature or polarized toward resorptive activities as those on mineralized plates. These results underscore how OCs adjust their molecular strategies based on substrate cues, providing insights into bone metabolism and potential targets for therapeutic intervention in bone-related disorders.

Enrichment analysis reveals that GEFs are involved in osteoclastogenesis on mineralized and plastic plates. Although GEFs were not significantly enriched on mineralized plates, their presence suggests a potential role in bone remodeling and resorption. GEFs were significantly enriched on plastic plates, indicating their importance in adapting cellular signaling to a non-mineralized environment. This highlights GEFs as key players in osteoclast biology and potential targets for future therapies in bone disorders despite the current lack of direct GEF-targeting treatments [20–22].

Enriched protein analysis of OCs cultured on plastic surfaces identifies several potential therapeutic targets for bone diseases, including DHH, IHH, NCOR2, SHH, SNX4, NOS1, REC8, SYMPK, XIAP, and TACC2. These proteins are linked to pathways critical for bone health and regulation. Specifically, DHH, IHH, and SHH, forming a distinct cluster, indicate their pivotal roles in signaling cascades essential for osteoclastogenesis and bone remodeling [23–26]. The Hedgehog (Hh) pathway is critical in skeletal development, guiding OC differentiation and bone formation from embryonic stages to adulthood [23,24]. SHH is particularly notable for its therapeutic potential and has been extensively studied in diseases such as osteosarcoma and skeletal dysplasia [26]. While studied for its role in embryonic skeletal patterning, DHH remains less explored as a therapeutic target than SHH. IHH, similarly implicated in bone biology and development, has also received less attention in therapeutic research [25]. Continued investigation into DHH and IHH may reveal their full potential for therapeutic interventions in bone diseases and related conditions. Activation of Smoothened (SMO) and various Hh family signaling pathways are integral for mediating essential cellular responses fundamental to OC development and function, highlighting their potential as therapeutic targets for modulating bone metabolism and related diseases [27–29].

Beyond Hh signaling, other pathways implicated in osteoclastogenesis include a diverse array of molecular complexes and regulatory processes [30,31]. This encompasses the Nitric Oxide (NO) synthase-dystrophin complex in skeletal muscle, both canonical and non-canonical Hedgehog signaling pathways involving ARRB1/ARRB2, intraflagellar transport mediated by BBSome interactions, and specific Hh family signaling events [32–34]. Additionally, the SMRT-SKIP-CBF1 complex and chromatin remodeling complexes (TACC2, TACC3, and PCAF) significantly contribute to gene regulation and cellular differentiation processes critical for OC development [35,36]. The involvement of the polyadenylation complex further underscores the intricate mechanisms governing mRNA processing and stability in osteoclastogenesis [37].

The NCOR2 protein, also known as Nuclear Receptor Corepressor 2, plays a significant role in osteoclastogenesis by modulating gene expression in response to various signals, thereby influencing the differentiation and activity of OCs in bone remodeling processes [38–40]. NOS1, which regulates nitric oxide production, impacts bone remodeling and OC function [41–43]. Among less frequently noted proteins, XIAP stands out for its anti-apoptotic functions and regulation of cell survival pathways, influencing OC survival and function [44–47].

Enriched protein analysis of OCs cultured on mineralized surfaces highlights IRS1 as a potential therapeutic target for bone diseases, reflecting its involvement in bone metabolism and skeletal health through insulin signaling pathways [48–50]. Conversely, ITK's role in bone diseases remains less explored despite its primary function in T-cell signaling and immune responses. Emerging research suggests ITK may influence OC differentiation, which is critical in bone remodeling and associated with autoimmune and inflammatory conditions [51,52]. IGHG3, IGHG4, IGHG1, and IGHG2 encode different immunoglobulin heavy chain gamma (IgG) subtypes, typically associated with immune responses rather than direct bone disease involvement. MSX1, involved in craniofacial and skeletal development, and AKT, critical for cell survival and growth, are relevant to bone biology and may hold therapeutic potential for bone diseases [53–56].

## Conclusions

In conclusion, our analysis highlights distinct molecular adaptations of mature, polarized OCs based on substrate type. OCs on mineralized plates are enriched in pathways critical for bone resorption and remodeling, such as VEGF/VEGFR signaling and cytokine pathways, indicating a mature, resorptive phenotype. Conversely, OCs on plastic plates show

enrichment in pathways related to cellular maintenance, reflecting a focus on sustaining cellular functions rather than active resorption.

Key therapeutic targets for mature OCs include components of the Hedgehog (Hh) pathway (e.g., SHH, DHH, IHH, and Smoothened) and GEFs, which are crucial for adaptation to non-mineralized environments. Additionally, regulators like NCOR2, NOS1, and XIAP, along with chromatin remodeling proteins such as TACC2, and signaling pathways involving IRS1, MSX1, and AKT, offer potential therapeutic avenues. These findings underscore the complexity of OC differentiation and function and suggest new strategies for modulating bone metabolism and addressing bone disorders.

The targets identified are specific to polarized OCs and may not apply to non-polarized OCs or other cell types. This specificity enhances our understanding of substrate-specific adaptations in OC biology and highlights potential therapeutic targets for bone-related conditions.

## Supporting information

**S1 Table.** Complete table with the data analyzed using enrichment analysis. <https://maayanlab.cloud/Enrichr/> (XLSX)

**S2 Table.** Enrichment analysis of the pathways and their corresponding proteins and genes in osteoclasts cultured on plastic plates combining 22 databases. Reactome, Bioplanet, Wikipathway, KEEG, ARCHS4, Elsevier, MsigDB, Biocarta, Human, NCI-Nature, Bioplex, HUmap, PPIHub, KEA 2015, Virus Host, NURSA, CORUM, HMS LINCS, SUBcell, The Kinase Library, PFOCR and Rummagene. (XLSX)

**S3 Table.** Enrichment analysis of the pathways and their corresponding proteins and genes in osteoclasts cultured on mineralized plates combining 21 databases. Reactome, Bioplanet, Wikipathway, ARCHS4, Elsevier, Biocarta, NCI-Nature, Bioplex, huMAP, PPIhub, KEA, Kinase perturbations down, Kinase perturbations up, Virus Host, CORUM, HMS LINCS, DEPOD, Glygen, The Kinase Library, PFOCR and Rummagene. (XLSX)

## Author contributions

**Conceptualization:** Fernanda D'Amélio, Hugo Vigerelli, Adriana da Costa Neves, Daniel Pimenta, Irina Kerkis.

**Data curation:** Fernanda D'Amélio, Hugo Vigerelli, Álvaro Rossan de Brandão Prieto-da-Silva, Irina Kerkis.

**Formal analysis:** Fernanda D'Amélio, Álvaro Rossan de Brandão Prieto-da-Silva, Daniel Pimenta, Irina Kerkis.

**Funding acquisition:** Irina Kerkis.

**Investigation:** Fernanda D'Amélio, Adriana da Costa Neves, Daniel Pimenta.

**Methodology:** Fernanda D'Amélio, Hugo Vigerelli, Adriana da Costa Neves, Álvaro Rossan de Brandão Prieto-da-Silva, Daniel Pimenta.

**Project administration:** Irina Kerkis.

**Resources:** Irina Kerkis.

**Software:** Fernanda D'Amélio.

**Supervision:** Irina Kerkis.

**Validation:** Fernanda D'Amélio.

**Visualization:** Fernanda D'Amélio, Irina Kerkis.

**Writing – original draft:** Fernanda D'Amélio, Álvaro Rossan de Brandão Prieto-da-Silva, Irina Kerkis.

**Writing – review & editing:** Fernanda D'Amélio, Álvaro Rossan de Brandão Prieto-da-Silva, Irina Kerkis.

## References

- Teitelbaum SL. Bone resorption by osteoclasts. *Science*. 2000;289(5484):1504–8. <https://doi.org/10.1126/science.289.5484.1504> PMID: [10968780](#)
- Teitelbaum SL. Osteoclasts: what do they do and how do they do it?. *Am J Pathol*. 2007;170(2):427–35. <https://doi.org/10.2353/ajpath.2007.060834> PMID: [17255310](#)
- Boyle WJ, Simonet WS, Lacey DL. Osteoclast differentiation and activation. *Nature*. 2003;423(6937):337–42. <https://doi.org/10.1038/nature01658> PMID: [12748652](#)
- Väänänen HK, Laitala-Leinonen T. Osteoclast lineage and function. *Arch Biochem Biophys*. 2008;473(2):132–8. <https://doi.org/10.1016/j.abb.2008.03.037> PMID: [18424258](#)
- Lacey DL, Timms E, Tan H-L, Kelley MJ, Dunstan CR, Burgess T, et al. Osteoprotegerin ligand is a cytokine that regulates osteoclast differentiation and activation. *Cell*. 1998;93(2):165–76. [https://doi.org/10.1016/s0092-8674\(00\)81569-x](https://doi.org/10.1016/s0092-8674(00)81569-x)
- Takayanagi H, Kim S, Koga T, Nishina H, Isshiki M, Yoshida H, et al. Induction and activation of the transcription factor NFATc1 (NFAT2) integrate RANKL signaling in terminal differentiation of osteoclasts. *Developmental Cell*. 2002;3(6):889–901. [https://doi.org/10.1016/s1534-5807\(02\)00369-6](https://doi.org/10.1016/s1534-5807(02)00369-6)
- D'Amélio F, Vigerelli H, Prieto-da-Silva ÁR de B, Osório Frare E, Batista I de FC, Pimenta DC, et al. Bothrops moojeni venom and its components strongly affect osteoclasts' maturation and protein patterns. *Toxins (Basel)*. 2021;13(7):459. <https://doi.org/10.3390/toxins13070459> PMID: [34208941](#)
- Sims NA, Gooi JH. Bone remodeling: Multiple cellular interactions required for coupling of bone formation and resorption. *Semin Cell Dev Biol*. 2008;19(5):444–51. <https://doi.org/10.1016/j.semcdb.2008.07.016> PMID: [18718546](#)
- Costa DO, Prowse PDH, Chrones T, Sims SM, Hamilton DW, Rizkalla AS, et al. The differential regulation of osteoblast and osteoclast activity by surface topography of hydroxyapatite coatings. *Biomaterials*. 2013;34(30):7215–26. <https://doi.org/10.1016/j.biomaterials.2013.06.014> PMID: [23830579](#)
- Costa-Rodrigues J, Carmo S, Perpétuo IP, Monteiro FJ, Fernandes MH. Osteoclastogenic differentiation of human precursor cells over micro- and nanostructured hydroxyapatite topography. *Biochim Biophys Acta*. 2016;1860(4):825–35. <https://doi.org/10.1016/j.bbagen.2016.01.014> PMID: [26801877](#)
- Pathan M, Keerthikumar S, Ang C-S, Gangoda L, Quek CYJ, Williamson NA, et al. FunRich: an open access standalone functional enrichment and interaction network analysis tool. *Proteomics*. 2015;15(15):2597–601. <https://doi.org/10.1002/pmic.201400515> PMID: [25921073](#)
- Itzstein C, Coxon FP, Rogers MJ. The regulation of osteoclast function and bone resorption by small GTPases. *Small GTPases*. 2011;2(3):117–30. <https://doi.org/10.4161/sgtp.2.3.16453> PMID: [21776413](#)
- Weivoda MM, Oursler MJ. The roles of small GTPases in osteoclast biology. *Orthop Muscular Syst*. 2014;3:1000161. <https://doi.org/10.4172/2161-0533.1000161> PMID: [25599004](#)
- Gray C, Marie H, Arora M, Tanaka K, Boyde A, Jones S, et al. Glutamate does not play a major role in controlling bone growth. *J Bone Miner Res*. 2001;16(4):742–9. <https://doi.org/10.1359/jbmr.2001.16.4.742> PMID: [11316002](#)
- Carmeliet P. Angiogenesis in health and disease. *Nat Med*. 2003;9(6):653–60. <https://doi.org/10.1038/nm0603-653> PMID: [12778163](#)
- Hu K, Olsen BR. The roles of vascular endothelial growth factor in bone repair and regeneration. *Bone*. 2016;91:30–8. <https://doi.org/10.1016/j.bone.2016.06.013> PMID: [27353702](#)
- Timmen M, Hidding H, Götte M, Khassawna TE, Kronenberg D, Stange R. The heparan sulfate proteoglycan Syndecan-1 influences local bone cell communication via the RANKL/OPG axis. *Sci Rep*. 2020;10(1):20510. <https://doi.org/10.1038/s41598-020-77510-3> PMID: [33239699](#)
- Rivera-Villaseñor A, Higinio-Rodríguez F, Nava-Gómez L, Vázquez-Prieto B, Calero-Vargas I, Olivares-Moreno R, et al. NMDA receptor hypofunction in the aging-associated malfunction of peripheral tissue. *Front Physiol*. 2021;12:687121. <https://doi.org/10.3389/fphys.2021.687121> PMID: [34248675](#)
- Xu J, Yu L, Liu F, Wan L, Deng Z. The effect of cytokines on osteoblasts and osteoclasts in bone remodeling in osteoporosis: a review. *Front Immunol*. 2023;14:1222129. <https://doi.org/10.3389/fimmu.2023.1222129> PMID: [37475866](#)
- Takegahara N, Kang S, Nojima S, Takamatsu H, Okuno T, Kikutani H, et al. Integral roles of a guanine nucleotide exchange factor, FARP2, in osteoclast podosome rearrangements. *FASEB J*. 2010;24(12):4782–92. <https://doi.org/10.1096/fj.10-158212> PMID: [20702777](#)
- Kureel J, John AA, Prakash R, Singh D. MiR 376c inhibits osteoblastogenesis by targeting Wnt3 and ARF-GEF-1 -facilitated augmentation of beta-catenin transactivation. *J Cell Biochem*. 2018;119(4):3293–303. <https://doi.org/10.1002/jcb.26490> PMID: [29125885](#)
- Kang IS, Jang JS, Kim C. Opposing roles of hematopoietic-specific small GTPase Rac2 and the guanine nucleotide exchange factor Vav1 in osteoclast differentiation. *Sci Rep*. 2020;10(1):7024. <https://doi.org/10.1038/s41598-020-63673-6> PMID: [32341385](#)
- Yang J, Andre P, Ye L, Yang Y-Z. The Hedgehog signalling pathway in bone formation. *Int J Oral Sci*. 2015;7(2):73–9. <https://doi.org/10.1038/ijos.2015.14> PMID: [26023726](#)
- Zhou H, Zhang L, Chen Y, Zhu C-H, Chen F-M, Li A. Research progress on the hedgehog signalling pathway in regulating bone formation and homeostasis. *Cell Prolif*. 2022;55(1):e13162. <https://doi.org/10.1111/cpr.13162> PMID: [34918401](#)



25. Smith AE, Sigurbjörnsdóttir ES, Steingrímsson E, Sigurbjörnsdóttir S. Hedgehog signalling in bone and osteoarthritis: the role of Smoothed and cholesterol. *FEBS J.* 2023;290(12):3059–75. <https://doi.org/10.1111/febs.16440> PMID: [35305060](#)
26. Jia Y, Miao Y, Yue M, Shu M, Wei Z, Dai Y, et al. Tetrandrine attenuates the bone erosion in collagen-induced arthritis rats by inhibiting osteoclastogenesis via spleen tyrosine kinase. *FASEB J.* 2018 Jun;32(6):3398–410. Epub 2018 Jan 30. <https://doi.org/10.1096/fj.201701148RR> PMID: [29401630](#)
27. Briscoe J, Théron PP. The mechanisms of Hedgehog signalling and its roles in development and disease. *Nat Rev Mol Cell Biol.* 2013;14(7):416–29. <https://doi.org/10.1038/nrm3598> PMID: [23719536](#)
28. Larsen LJ, Møller LB. Crosstalk of hedgehog and mTORC1 pathways. *Cells.* 2020;9(10):2316. <https://doi.org/10.3390/cells9102316> PMID: [33081032](#)
29. Zhang J, Liu Z, Jia J. Mechanisms of smoothed regulation in hedgehog signaling. *Cells.* 2021;10(8):2138. <https://doi.org/10.3390/cells10082138> PMID: [34440907](#)
30. Ingham PW, McMahon AP. Hedgehog signaling in animal development: paradigms and principles. *Genes Dev.* 2001;15(23):3059–87. <https://doi.org/10.1101/gad.938601> PMID: [11731473](#)
31. Rimkus TK, Carpenter RL, Qasem S, Chan M, Lo H-W. Targeting the sonic hedgehog signaling pathway: review of smoothed and GLI inhibitors. *Cancers (Basel).* 2016;8(2):22. <https://doi.org/10.3390/cancers8020022> PMID: [26891329](#)
32. Sander M, Chavoshan B, Harris SA, Iannaccone ST, Stull JT, Thomas GD, et al. Functional muscle ischemia in neuronal nitric oxide synthase-deficient skeletal muscle of children with Duchenne muscular dystrophy. *Proc Natl Acad Sci U S A.* 2000;97(25):13818–23. <https://doi.org/10.1073/pnas.250379497> PMID: [11087833](#)
33. Shenoy SK, Lefkowitz RJ. Multifaceted roles of beta-arrestins in the regulation of seven-membrane-spanning receptor trafficking and signalling. *Biochem J.* 2003;375(Pt 3):503–15. <https://doi.org/10.1042/BJ20031076> PMID: [12959637](#)
34. Jin H, White SR, Shida T, Schulz S, Aguiar M, Gygi SP, et al. The conserved Bardet-Biedl syndrome proteins assemble a coat that traffics membrane proteins to cilia. *Cell.* 2010;141(7):1208–19. <https://doi.org/10.1016/j.cell.2010.05.015> PMID: [20603001](#)
35. Zhou S, Fujimuro M, Hsieh JJ, Chen L, Miyamoto A, Weinmaster G, et al. SKIP, a CBF1-associated protein, interacts with the ankyrin repeat domain of Notch1C To facilitate Notch1C function. *Mol Cell Biol.* 2000;20(7):2400–10. <https://doi.org/10.1128/MCB.20.7.2400-2410.2000> PMID: [10713164](#)
36. Wood MA, McMahon SB, Cole MD. An ATPase/Helicase complex is an essential cofactor for oncogenic transformation by c-Myc. *Molecular Cell.* 2000;5(2):321–30. [https://doi.org/10.1016/s1097-2765\(00\)80427-x](https://doi.org/10.1016/s1097-2765(00)80427-x)
37. Shi Y, Manley JL. The end of the message: multiple protein–RNA interactions define the mRNA polyadenylation site. *Genes Dev.* 2015;29(9):889–97. <https://doi.org/10.1101/gad.261974.115>
38. Torres HM, Arnold KM, Oviedo M, Westendorf JJ, Weaver SR, Oviedo M, et al. Inflammatory processes affecting bone health and repair. *Curr Osteopor Rep.* 2023 Dec;21(6):842–53. Epub 2023 Sep 28. <https://doi.org/10.1007/s11914-023-00824-4> PMID: [37759135](#); PMCID: PMC10842967
39. Abe Y, Kofman ER, Almeida M, Ouyang Z, Ponte F, Mueller JR, et al. RANK ligand converts the NCoR/HDAC3 co-repressor to a PGC1 $\beta$ - and RNA-dependent co-activator of osteoclast gene expression. *Mol Cell.* 2023;83(19):3421–3437.e11. <https://doi.org/10.1016/j.molcel.2023.08.029> PMID: [37751740](#)
40. Abe Y, Kofman ER, Ouyang Z, Cruz-Becerra G, Spann NJ, Seidman JS, et al. A TLR4/TRAF6-dependent signaling pathway mediates NCoR coactivator complex formation for inflammatory gene activation. *Proc Natl Acad Sci U S A.* 2024;121(2):e2316104121. <https://doi.org/10.1073/pnas.2316104121> PMID: [38165941](#)
41. van't Hof RJ, Macphree J, Libouban H, Helfrich MH, Ralston SH. Regulation of bone mass and bone turnover by neuronal nitric oxide synthase. *Endocrinology.* 2004;145(11):5068–74. <https://doi.org/10.1210/en.2004-0205> PMID: [15297441](#)
42. MacIntyre I, Zaidi M, Alam AS, Datta HK, Moonga BS, Lidbury PS, et al. Osteoclastic inhibition: an action of nitric oxide not mediated by cyclic GMP. *Proc Natl Acad Sci USA.* 1991;88(7):2936–40. <https://doi.org/10.1073/pnas.88.7.2936>
43. Van'T Hof RJ, Ralston SH. Nitric oxide and bone. *Immunology.* 2001;103(3):255–61. <https://doi.org/10.1046/j.1365-2567.2001.01261.x>
44. Pope RM. Apoptosis as a therapeutic tool in rheumatoid arthritis. *Nat Rev Immunol.* 2002;2(7):527–35. <https://doi.org/10.1038/nri846> PMID: [12094227](#)
45. Silke J, Meier P. Inhibitor of apoptosis (IAP) proteins-modulators of cell death and inflammation. *Cold Spring Harb Perspect Biol.* 2013;5(2):a008730. <https://doi.org/10.1101/cshperspect.a008730> PMID: [23378585](#)
46. Malesud CJ. Intracellular signaling pathways in rheumatoid arthritis. *J Clin Cell Immunol.* 2013;4:160. <https://doi.org/10.4172/2155-9899.1000160> PMID: [24619558](#)
47. Zhang M, Huang Y, Bai J, Xu W, Shan H, Sheng L, et al. XAF1 promotes osteoclast apoptosis by antagonizing the XIAP-caspase axis. *J Orthop Translat.* 2024;47:15–28. <https://doi.org/10.1016/j.jot.2024.05.001> PMID: [38957269](#)
48. Klein GL. Insulin and bone: recent developments. *World J Diabetes.* 2014;5(1):14–6. <https://doi.org/10.4239/wjcd.v5.i1.14> PMID: [24567798](#)
49. Cipriani C, Colangelo L, Santori R, Renella M, Mastrantonio M, Minisola S, et al. The interplay between bone and glucose metabolism. *Front Endocrinol (Lausanne).* 2020;11:122. <https://doi.org/10.3389/fendo.2020.00122> PMID: [32265831](#)

50. Fu Y-H, Liu W-J, Lee C-L, Wang J-S. Associations of insulin resistance and insulin secretion with bone mineral density and osteoporosis in a general population. *Front Endocrinol (Lausanne)*. 2022;13:971960. <https://doi.org/10.3389/fendo.2022.971960> PMID: [36204101](https://pubmed.ncbi.nlm.nih.gov/36204101/)
51. Gomez-Rodriguez J, Sahu N, Handon R, Davidson TS, Anderson SM, Kirby MR, et al. Differential expression of interleukin-17A and -17F is coupled to T cell receptor signaling via inducible T cell kinase. *Immunity*. 2009;31(4):587–97. <https://doi.org/10.1016/j.immuni.2009.07.009> PMID: [19818650](https://pubmed.ncbi.nlm.nih.gov/19818650/)
52. Gomez-Rodriguez J, Wohlfert EA, Handon R, Meylan F, Wu JZ, Anderson SM, et al. Itk-mediated integration of T cell receptor and cytokine signaling regulates the balance between Th17 and regulatory T cells. *J Exp Med*. 2014;211(3):529–43. <https://doi.org/10.1084/jem.20131459>
53. Satokata I, Maas R. Msx1 deficient mice exhibit cleft palate and abnormalities of craniofacial and tooth development. *Nat Genet*. 1994;6(4):348–56. <https://doi.org/10.1038/ng0494-348> PMID: [7914451](https://pubmed.ncbi.nlm.nih.gov/7914451/)
54. Alappat S, Zhang ZY, Chen YP. Msx homeobox gene family and craniofacial development. *Cell Res*. 2003;13(6):429–42. <https://doi.org/10.1038/sj.cr.7290185>
55. Sugatani T, Hruska KA. Akt1/Akt2 and mammalian target of rapamycin/Bim play critical roles in osteoclast differentiation and survival, respectively, whereas Akt is dispensable for cell survival in isolated osteoclast precursors. *J Biol Chem*. 2005;280(5):3583–9. <https://doi.org/10.1074/jbc.M410480200> PMID: [15545269](https://pubmed.ncbi.nlm.nih.gov/15545269/)
56. Kawamura N, Kugimiya F, Oshima Y, Ohba S, Ikeda T, Saito T, et al. Akt1 in osteoblasts and osteoclasts controls bone remodeling. *PLoS ONE*. 2007;2(10):e1058. <https://doi.org/10.1371/journal.pone.0001058>
